# Supplementary material for: Ewastools: Infinium Human Methylation BeadChip pipeline for population epigenetics integrated into Galaxy
Source: PubMed Central journal article supplement (PMC7219210; doi:10.1093/gigascience/giaa049), 2020-05-13

# GigaScience

## Ewastools: Infinium Human Methylation BeadChip pipeline for population epigenetics integrated into Galaxy

--Manuscript Draft--

|                                                      |                                                                                                                                                                                                                                                                                                                                                                                                                                                                                                                                                                                                                                                                                                                                                                                                                                                                                                                                                                                                                                                                                                                                                                                                                                                                                                                                                                                                                                                                                                                                                                                      |
|------------------------------------------------------|--------------------------------------------------------------------------------------------------------------------------------------------------------------------------------------------------------------------------------------------------------------------------------------------------------------------------------------------------------------------------------------------------------------------------------------------------------------------------------------------------------------------------------------------------------------------------------------------------------------------------------------------------------------------------------------------------------------------------------------------------------------------------------------------------------------------------------------------------------------------------------------------------------------------------------------------------------------------------------------------------------------------------------------------------------------------------------------------------------------------------------------------------------------------------------------------------------------------------------------------------------------------------------------------------------------------------------------------------------------------------------------------------------------------------------------------------------------------------------------------------------------------------------------------------------------------------------------|
| <b>Manuscript Number:</b>                            | GIGA-D-19-00088R2                                                                                                                                                                                                                                                                                                                                                                                                                                                                                                                                                                                                                                                                                                                                                                                                                                                                                                                                                                                                                                                                                                                                                                                                                                                                                                                                                                                                                                                                                                                                                                    |
| <b>Full Title:</b>                                   | Ewastools: Infinium Human Methylation BeadChip pipeline for population epigenetics integrated into Galaxy                                                                                                                                                                                                                                                                                                                                                                                                                                                                                                                                                                                                                                                                                                                                                                                                                                                                                                                                                                                                                                                                                                                                                                                                                                                                                                                                                                                                                                                                            |
| <b>Article Type:</b>                                 | Technical Note                                                                                                                                                                                                                                                                                                                                                                                                                                                                                                                                                                                                                                                                                                                                                                                                                                                                                                                                                                                                                                                                                                                                                                                                                                                                                                                                                                                                                                                                                                                                                                       |
| <b>Funding Information:</b>                          |                                                                                                                                                                                                                                                                                                                                                                                                                                                                                                                                                                                                                                                                                                                                                                                                                                                                                                                                                                                                                                                                                                                                                                                                                                                                                                                                                                                                                                                                                                                                                                                      |
| <b>Abstract:</b>                                     | <p>Background, Infinium Human Methylation BeadChip is an array platform for complex evaluation of DNA methylation at an individual CpG loci in the human genome based on Illumina's bead technology and it is one of the most common techniques used in epigenome-wide association studies (EWAS). Finding associations between epigenetic variation and phenotype is a significant challenge in biomedical research. The newest version, Human Methylation EPIC, quantifies the DNA methylation level of 850k CpG sites, while the previous versions, HumanMethylation450 and HumanMethylation27, measured over 450k and 27k loci, respectively. Although a number of bioinformatics tools have been developed to analyse this assay, they require some programming skills and experience in order to be usable. Results, We have developed a pipeline for the Galaxy platform for those without experience aimed at DNA methylation analysis using the Infinium Human Methylation BeadChip. Our tool is integrated into Galaxy (<a href="http://galaxyproject.org">http://galaxyproject.org</a>), a web based platform. This allows users to analyse data from the Infinium Human Methylation BeadChip in the easiest possible way. Conclusions, The pipeline provides a group of integrated analytical methods wrapped into an easy to use interface. Our tool is available from the Galaxy toolshed, GitHub repository and also as a Docker image. The aim of this project is to make Infinium Human Methylation BeadChip analysis more flexible and accessible to everyone.</p> |
| <b>Corresponding Author:</b>                         | Krzysztof Poterlowicz<br>University of Bradford<br>Bradford, Bradford UNITED KINGDOM                                                                                                                                                                                                                                                                                                                                                                                                                                                                                                                                                                                                                                                                                                                                                                                                                                                                                                                                                                                                                                                                                                                                                                                                                                                                                                                                                                                                                                                                                                 |
| <b>Corresponding Author Secondary Information:</b>   |                                                                                                                                                                                                                                                                                                                                                                                                                                                                                                                                                                                                                                                                                                                                                                                                                                                                                                                                                                                                                                                                                                                                                                                                                                                                                                                                                                                                                                                                                                                                                                                      |
| <b>Corresponding Author's Institution:</b>           | University of Bradford                                                                                                                                                                                                                                                                                                                                                                                                                                                                                                                                                                                                                                                                                                                                                                                                                                                                                                                                                                                                                                                                                                                                                                                                                                                                                                                                                                                                                                                                                                                                                               |
| <b>Corresponding Author's Secondary Institution:</b> |                                                                                                                                                                                                                                                                                                                                                                                                                                                                                                                                                                                                                                                                                                                                                                                                                                                                                                                                                                                                                                                                                                                                                                                                                                                                                                                                                                                                                                                                                                                                                                                      |
| <b>First Author:</b>                                 | Katarzyna Murat                                                                                                                                                                                                                                                                                                                                                                                                                                                                                                                                                                                                                                                                                                                                                                                                                                                                                                                                                                                                                                                                                                                                                                                                                                                                                                                                                                                                                                                                                                                                                                      |
| <b>First Author Secondary Information:</b>           |                                                                                                                                                                                                                                                                                                                                                                                                                                                                                                                                                                                                                                                                                                                                                                                                                                                                                                                                                                                                                                                                                                                                                                                                                                                                                                                                                                                                                                                                                                                                                                                      |
| <b>Order of Authors:</b>                             | Katarzyna Murat<br>Björn Grüning<br>Paulina Wiktoria Poterlowicz<br>Gillian Westgate<br>Desmond J Tobin<br>Krzysztof Poterlowicz                                                                                                                                                                                                                                                                                                                                                                                                                                                                                                                                                                                                                                                                                                                                                                                                                                                                                                                                                                                                                                                                                                                                                                                                                                                                                                                                                                                                                                                     |
| <b>Order of Authors Secondary Information:</b>       |                                                                                                                                                                                                                                                                                                                                                                                                                                                                                                                                                                                                                                                                                                                                                                                                                                                                                                                                                                                                                                                                                                                                                                                                                                                                                                                                                                                                                                                                                                                                                                                      |

|                                                                                                                                                                                                                                                                                                                                                                                                                                    |                                                                                                                                                                                                                                                                                                                                                                                                                                                                                                                                                                                                                                                                                                                                                                                                                                                                                                                                                                                                                                                                                                                                                                                                                                                                                                                                                                                                                                                                                                                                                                      |
|------------------------------------------------------------------------------------------------------------------------------------------------------------------------------------------------------------------------------------------------------------------------------------------------------------------------------------------------------------------------------------------------------------------------------------|----------------------------------------------------------------------------------------------------------------------------------------------------------------------------------------------------------------------------------------------------------------------------------------------------------------------------------------------------------------------------------------------------------------------------------------------------------------------------------------------------------------------------------------------------------------------------------------------------------------------------------------------------------------------------------------------------------------------------------------------------------------------------------------------------------------------------------------------------------------------------------------------------------------------------------------------------------------------------------------------------------------------------------------------------------------------------------------------------------------------------------------------------------------------------------------------------------------------------------------------------------------------------------------------------------------------------------------------------------------------------------------------------------------------------------------------------------------------------------------------------------------------------------------------------------------------|
| <p><b>Response to Reviewers:</b></p>                                                                                                                                                                                                                                                                                                                                                                                               | <p>GIGA-D-19-00088R1<br/> Ewastools: Infinium Human Methylation BeadChip pipeline for population epigenetics integrated into Galaxy<br/> Katarzyna Murat; Björn Grüning; Paulina Wiktoria Poterlowicz; Gillian Westgate; Desmond J Tobin; Krzysztof Poterlowicz<br/> GigaScience</p> <p>Dear Dr Poterlowicz,</p> <p>Your manuscript "Ewastools: Infinium Human Methylation BeadChip pipeline for population epigenetics integrated into Galaxy" (GIGA-D-19-00088R1) has been assessed by our reviewers. Based on these reports, and my own assessment as Editor, I am pleased to inform you that it is potentially acceptable for publication in GigaScience, once you have carried out some final edits that I will send along with an annotated version of the paper. The key one is to cite the GigaDB DOI in the Availability of Supporting Data section as follows:</p> <p>Archival snapshots of the code are available in the GigaScience GigaDB repository [31].</p> <p>Then you need to cite the DOI as reference 31 as follows:</p> <p>31. Murat K; Gruening B; Poterlowicz PW; Westgate G; Tobin DJ; Poterlowicz K (2020): Supporting data for "Ewastools: Infinium Human Methylation BeadChip pipeline for population epigenetics integrated into Galaxy" GigaScience Database. <a href="http://dx.doi.org/10.5524/100744">http://dx.doi.org/10.5524/100744</a></p> <p>Authors:</p> <p>We would like to thank the reviewers and the editors for their careful assessment of the manuscript and we confirm that we addressed the comments accordingly.</p> |
| <p><b>Additional Information:</b></p>                                                                                                                                                                                                                                                                                                                                                                                              |                                                                                                                                                                                                                                                                                                                                                                                                                                                                                                                                                                                                                                                                                                                                                                                                                                                                                                                                                                                                                                                                                                                                                                                                                                                                                                                                                                                                                                                                                                                                                                      |
| <p><b>Question</b></p>                                                                                                                                                                                                                                                                                                                                                                                                             | <p><b>Response</b></p>                                                                                                                                                                                                                                                                                                                                                                                                                                                                                                                                                                                                                                                                                                                                                                                                                                                                                                                                                                                                                                                                                                                                                                                                                                                                                                                                                                                                                                                                                                                                               |
| <p>Are you submitting this manuscript to a special series or article collection?</p>                                                                                                                                                                                                                                                                                                                                               | <p>No</p>                                                                                                                                                                                                                                                                                                                                                                                                                                                                                                                                                                                                                                                                                                                                                                                                                                                                                                                                                                                                                                                                                                                                                                                                                                                                                                                                                                                                                                                                                                                                                            |
| <p><b>Experimental design and statistics</b></p> <p>Full details of the experimental design and statistical methods used should be given in the Methods section, as detailed in our <a href="#">Minimum Standards Reporting Checklist</a>. Information essential to interpreting the data presented should be made available in the figure legends.</p> <p>Have you included all the information requested in your manuscript?</p> | <p>Yes</p>                                                                                                                                                                                                                                                                                                                                                                                                                                                                                                                                                                                                                                                                                                                                                                                                                                                                                                                                                                                                                                                                                                                                                                                                                                                                                                                                                                                                                                                                                                                                                           |

|                                                                                                                                                                                                                                                                                                                                                                                                                                                                                                                                                         |            |
|---------------------------------------------------------------------------------------------------------------------------------------------------------------------------------------------------------------------------------------------------------------------------------------------------------------------------------------------------------------------------------------------------------------------------------------------------------------------------------------------------------------------------------------------------------|------------|
| <p><b>Resources</b></p> <p>A description of all resources used, including antibodies, cell lines, animals and software tools, with enough information to allow them to be uniquely identified, should be included in the Methods section. Authors are strongly encouraged to cite <a href="#">Research Resource Identifiers</a> (RRIDs) for antibodies, model organisms and tools, where possible.</p> <p>Have you included the information requested as detailed in our <a href="#">Minimum Standards Reporting Checklist</a>?</p>                     | <p>Yes</p> |
| <p><b>Availability of data and materials</b></p> <p>All datasets and code on which the conclusions of the paper rely must be either included in your submission or deposited in <a href="#">publicly available repositories</a> (where available and ethically appropriate), referencing such data using a unique identifier in the references and in the “Availability of Data and Materials” section of your manuscript.</p> <p>Have you have met the above requirement as detailed in our <a href="#">Minimum Standards Reporting Checklist</a>?</p> | <p>Yes</p> |

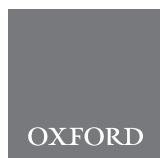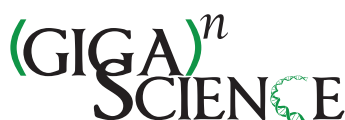

GigaScience, 2018, 1–6

doi: xx.xxxx/xxxx

Manuscript in Preparation

Technical note

## TECHNICAL NOTE

# Ewastools: Infinium Human Methylation BeadChip pipeline for population epigenetics integrated into Galaxy

Katarzyna Murat<sup>1</sup>, Björn Grüning<sup>ib</sup> <sup>2</sup>, Paulina Wiktoria Poterłowicz<sup>3</sup>, Gillian Westgate<sup>ib</sup> <sup>1</sup>, Desmond J Tobin<sup>ib</sup> <sup>4,1</sup> and Krzysztof Poterłowicz<sup>ib</sup> <sup>1</sup>,✉

<sup>1</sup>Center for Skin Sciences, University of Bradford, Bradford, BD7 1DP, United Kingdom and <sup>2</sup>Freiburg Galaxy Team, University of Freiburg, Fahrenbergplatz, 79085 Freiburg im Breisgau, Germany and <sup>3</sup>Hull York Medical School, University of York, York, YO10 5DD, United Kingdom and <sup>4</sup>The Charles Institute for Dermatology, School of Medicine, University College, Dublin, Ireland

✉k.poterlowicz1@bradford.ac.uk

## Abstract

**Background**, Infinium Human Methylation BeadChip is an array platform for complex evaluation of DNA methylation at an individual CpG loci in the human genome based on Illumina's bead technology and it is one of the most common techniques used in epigenome-wide association studies (EWAS). Finding associations between epigenetic variation and phenotype is a significant challenge in biomedical research. The newest version, HumanMethylationEPIC, quantifies the DNA methylation level of 850k CpG sites, while the previous versions, HumanMethylation450 and HumanMethylation27, measured over 450k and 27k loci, respectively. Although a number of bioinformatics tools have been developed to analyse this assay, they require some programming skills and experience in order to be usable. **Results**, We have developed a pipeline for the Galaxy platform for those without experience aimed at DNA methylation analysis using the Infinium Human Methylation BeadChip. Our tool is integrated into Galaxy (<http://galaxyproject.org>), a web based platform. This allows users to analyse data from the Infinium Human Methylation BeadChip in the easiest possible way. **Conclusions**, The pipeline provides a group of integrated analytical methods wrapped into an easy to use interface. Our tool is available from the Galaxy toolshed, GitHub repository and also as a Docker image. The aim of this project is to make Infinium Human Methylation BeadChip analysis more flexible and accessible to everyone.

**Key words**: Infinium Human Methylation BeadChip; Epigenome-Wide Association Studies (EWAS); DNA methylation; Galaxy Project; Pipeline; Sequence analysis

## Background

Over the last several years comprehensive sequencing data sets have been generated, allowing analysis of genome-wide activity in cohorts of different individuals to be increasingly available. Infinium Human Methylation BeadChip requires only a few days to produce methylome profiles of human samples with low sample input requirement (as low as 500 ng of ge-

nomic DNA) as the starting material [1]. Studies performed recently have identified variation naturally occurring in the genome associated with disease risk and prognosis, including tumour pathogenesis [2]. This raised interest in the concept of epigenome-wide association studies (EWAS). The term Epigenome means "on top of" the genome and refers to specific changes in genome regulatory activity occurring in response to environmental stimuli [3]. Epigenetic modifications do not

Compiled on: April 20, 2020.

Draft manuscript prepared by the author.

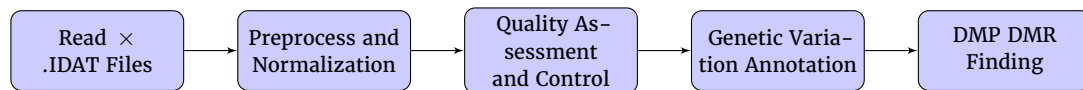

Figure 1. Simplified workflow for analysing epigenetics data

change the underlying DNA sequence, but can cause multiple changes in gene expression and cellular function [4]. In humans, DNA methylation occurs by attaching a methyl group to the cytosine residue. This has been suggested as a suppressor of gene expression [5]. Multiple methods for DNA methylation analysis were developed, including the polymerase chain reaction (PCR) and pyrosequencing of bisulfite converted DNA, dedicated to study a small number of methylation sites across a number of samples [6]. Assays like whole genome bisulfite sequencing (WGBS) and reduced representation bisulfite sequencing (RRBS) allow global quantification of DNA methylation levels. However, running this type of analysis for a larger number of samples can be prohibitively laborious and expensive [7]. The Infinium Human Methylation BeadChip [1] offers unprecedented applicability and affordability due to the low costs of reagents, short time of processing, high accuracy and low input DNA requirements. It determines quantitative array-based methylation measurements at the single-CpG-site level of over 850k loci [8] covering most of the promoters and also numerous other loci. This makes this assay suitable for systematic investigation of methylation changes in normal and diseased cells [3]. As such it has become one of the most comprehensive solutions on the market [9]. However, Illumina commercial software generates additional costs and it is not suitable for everyone. Therefore there is a need to create freely available software able to perform comprehensive analysis including quality control, normalisation and detection of differential-methylated regions [9]. Open-source software packages (e.g. DMRcate [10], Minfi [11], ChAMP [12], methylumi [13], RnBeads [14]) require high performance computational hardware as well as command line experience in order to run the analysis. This is why one of the aims of our Infinium Human Methylation BeadChip pipeline was to set and implement these methods into a user-friendly environment. The tool has been developed to provide users with an enhanced understanding of the Infinium Human Methylation BeadChip analysis. Workflow includes methods for preprocessing with stratified quantile normalisation preprocess. Quantile or extended implementation of functional normalisation preprocess Funnorm with unwanted variation removal, sample specific quality assessment and methodology for calling differentially-methylated regions and sites (DMR) and positions detection (DMP). Scripts were combined and published on the web based platform - Galaxy, a graphical interface with tools, ready to run workflows providing a solution for non-programmer scientists to analyse their data and share their experience with others [15]. Configuration files are publicly shared on our GitHub repository [16] with code and dependency settings also available to download and install via the Galaxy toolshed [17]. Our tool was created and tested using a Planemo [18] an integrated workspace for Galaxy tools development with a default configuration and shed tool setup available via Docker (operating-system-level virtualization) [16].

## Tools Description

The workflow combines 5 main steps (see Figure 1), starting with raw intensity data loading (`.idat`) and then preprocessing and optional normalisation of the data. The next quality control step performs an additional sample check to remove low-

quality data, which normalisation cannot detect. The workflow gives the user the opportunity to perform any of these preparation and data cleaning steps, including the next highly recommended genetic variation annotation step resulting in single nucleotide polymorphism identification and removal. Finally, the dataset generated through all of these steps can be used to find DMPs and regions DMRs with respect to a phenotype covariate. All the steps as well as single preparation and analysis options are shown in Figure 2 and explained in detail below.

## Data Loading

The Infinium Human Methylation BeadChip assay interrogates fluorescent signals (green and red) from the methylated and unmethylated sites into binary values which can be read directly as IDAT files [1]. Illumina's GenomeStudio (GenomeStudio, RRID:SCR\_010973) solution converts the data into plain-text ASCII files losing a large amount of information during this process [19]. To prevent this kind of data loss we introduced an R based .IDAT files loading method which is a combination of `illuminaio readIDAT` and `minfi RGChannelSet` functions. It reads intensity information from both treatment and control data and based on this it builds up a specific joined data set.

## Preprocessing and Normalisation

Green and red channel signals from .IDAT files can be converted into methylated and unmethylated signals assigned to methylation levels or Beta values. Betas are built in `RatioSet` object, and estimate the methylation level using channel ratios in a range between 0 and 1 with 0 being unmethylated and 1 being fully methylated [19]. However, these two classes can also be preprocessed and normalised with two methods available [19]. `Preprocess Quantile` implements stratified quantile normalisation preprocessing and is supported for small changes like in one-type samples e.g. blood datasets. In contrast, `preprocess Funnorm` is aimed at global biological differences such as healthy and occurred datasets with different tissue and cell types. This is called the between-array normalisation method and removes unwanted variation [19]. In addition unwanted probes containing either an SNP at the CpG interrogation or at the single nucleotide extension can be removed (recommended)[19].

## Quality Assessment and Control

Data quality assurance is an important step in Infinium Human Methylation BeadChip analysis. The quality control function extracts and plots the data frame with two columns `mMed` and `uMed` which are the medians of `MethylSet` signals (`Meth` and `Unmeth`). Comparing these against one another allows users to detect and remove low-quality samples that normalisation cannot correct [11].

## Annotating probes affected by genetic variation

Single nucleotide polymorphism (SNP) regions may affect results of downstream analysis. `Remove SNPs` step returns data frames containing the SNP information of unwanted probes

and removes them from the data set [19].

### DMPs and DMRs Identification

The main goal of the Infinium Human Methylation BeadChip tool is to simplify the way differentially-methylated loci sites are detected. The workflow contains a function detecting DMPs with respect to the phenotype covariate, and method for finding DMRs [11]. DMRs can be tracked using a bump hunting algorithm. The algorithm first implements a t-statistic at each methylated loci location, with optional smoothing, then groups probes into clusters with a maximum location gap and a cutoff size to refer the lowest possible value of genomic profile hunted by our tool [20].

### Functional Annotation and Visualisation

In addition to downstream analysis, users can access annotations provided via Illumina by ChIPpeakAnno (ChIPpeakAnno, RRID:SCR\_012828) annoPeaks tool [19] or perform additional functional annotations using the Gene Ontology (GO) via Cluster Profiler GO tool. The GO tool provides a very detailed representation of functional relationships between biological processes, molecular function and cellular components across data [21]. Once specific regions have been chosen, Cluster Profiler GO visualises enrichment results (see Figure 4). Many researchers use annotation analysis to characterise the function of genes, which highlights the potential for Galaxy to be a solution for wide-ranging multi-omics research.

### Documentation and Training

We have also provided training sessions and interactive tours for user self-learning. The training materials are freely accessible at the Galaxy (Galaxy, RRID:SCR\_006281) project Github repository [22]. Such training and tours guide users through an entire analysis. The following steps and notes help users to explore and better understand the concept. Slides and hands-on instruction describes the analysis workflow, all necessary input files are ready-to-use via Zenodo [23], as well as a Galaxy Interactive Tour, and a tailor-made Galaxy Docker image for the corresponding data analysis.

### Case Study

Compared to genetic studies EWAS provides a unique opportunity to study dynamic response to treatment. It has been suggested that DNA methylation is associated with drug resistance [24]. To validate our suite we have performed analysis of differentially-methylated regions using publicly available data from the Infinium Human Methylation BeadChip array of melanoma biopsies pre and post MAPKi treatment [25], obtained from the Gene Expression Omnibus (GEO) (GSE65183). Methylation profiling by genome tiling array in melanoma can help us understand how non-genomic and immune changes can have an impact on treatment efficiency and disease progression. Raw image IDAT files were loaded into the Galaxy environment using Data Libraries. EWAS workflow was run on Red and Green dataset collections of patient-matched melanoma tumours biopsied before therapy and during disease progression. The IDAT files, pre-defined phenotype tables and up-to-date genome tables (UCSC Main on Human hg19 Methyl450) [16] were used as inputs. In order to detect poorly performing samples we ran quality diagnostics. The provided samples passed the quality control test (on figure 3) as they clustered together with higher median intensities

confirming their good quality [19]. Differentially-methylated loci were identified using single probe analysis implemented by our tool with the following parameters: phenotype set as **categorical** and qCutoff size set to **0.05**. The bump hunting algorithm was applied to identify DMRs with maximum location gap parameter set to **250**, genomic profile above the cutoff equal to **0.1**, number of resamples set to **0**, null method set to **permutation** and verbose equal **FALSE** which means that no additional progress information will be printed. Differentially-Methylated Regions and Positions revealed the need for further investigation of tissue diversity in response to environmental changes [26]. Nearest transcription start sites (TSS) found in the gene set can be listed as follows: PITX1, SFRP2, MSX1, MIR21, AXIN2, GREM1, WT1, CBX2, HCK, GTSE1, SNGC, PDPN, PDGFRA, NAF1, FGF5, FOXE1, THBS1, DLK1 and HOX gene family. The results of the re-analysis are available in the Github repository ([https://github.com/kpbioteam/ewastools-case\\_study](https://github.com/kpbioteam/ewastools-case_study))

### Important Findings

Although hyper-methylated genes identified by 'EWAS-suite' have been previously associated with cancer, this is the first time a link between them and MAPKi treatment resistance is reported. This data demonstrates that PDGFR, which is suggested to be responsible for RAS/MAPK pathway signaling. Trough activation may regulate the MAPKi mechanism in non responsive tumours. The methylation regulation of this altered status of PDGFR requires additional studies [25]. The PITX1 suppressor gene was found as one of the factors decreasing gene expression in human cutaneous malignant melanoma and might contribute to progression and resistance via promoting cell proliferative activity [27]. It has been found that the homeodomain transcription factor MSX1 and the CBX2 polycomb group protein are likely to be treatment resistance factors and are reported as downregulated and inactivated in melanoma tumours [28]. Previous published studies are limited to local surveys and serial biopsies. Thus, the stimulus of innate or acquired MAPKi resistance may be linked to epigenetics. GO annotation, provides information regarding the function of genes [29]. GO analysis identified :the pattern specification process (GO:0007389), skeletal system development (GO:0001501) and regionalisation (GO:000300) as significantly over-represented categories within the above DMR's, suggesting that melanoma MAPKi resistance could be related to the cells developmental process within specific environments.

### Conclusion

With the rapidly increasing volume of epigenetics data available, computer-based analysis of heritable changes in gene expression becomes more and more feasible. Many genome-wide epigenetics studies have focused on generation of data, with data interpretation now being the challenge. Risk evaluation, disease management and novel therapeutic development are prompting researchers to find new bioinformatic frameworks and approaches. In this regard we propose a user friendly tool suite available via Galaxy platform. Ewastools allows life scientists to run complex epigenetics analysis. [16]. The case study presented provides a tangible example how the population epigenetics analysis can provide additional insights into melanoma therapeutic resistance.

**Infinium Human Methylation BeadChip** Determines differentially methylated regions and positions from idat files (Galaxy Version 2.1.0) ☆ Favorite ▼ Options

**Red .IDAT files**

8: GSM1588707\_8795207119\_R06C02\_Red.idat  
 7: GSM1588707\_8795207119\_R06C02\_Grn.idat  
 6: GSM1588706\_8795207135\_R02C02\_Red.idat  
 5: GSM1588706\_8795207135\_R02C02\_Grn.idat  
 4: GSM1588705\_8795207119\_R05C02\_Red.idat  
 3: GSM1588705\_8795207119\_R05C02\_Grn.idat  
 2: GSM1588704\_8795207135\_R01C02\_Red.idat

Red .IDAT files extension is followed by the unmethylated signal intensity read in the red channel.

**Green .IDAT files**

8: GSM1588707\_8795207119\_R06C02\_Red.idat  
 7: GSM1588707\_8795207119\_R06C02\_Grn.idat  
 6: GSM1588706\_8795207135\_R02C02\_Red.idat  
 5: GSM1588706\_8795207135\_R02C02\_Grn.idat  
 4: GSM1588705\_8795207119\_R05C02\_Red.idat  
 3: GSM1588705\_8795207119\_R05C02\_Grn.idat  
 2: GSM1588704\_8795207135\_R01C02\_Red.idat

Green .IDAT files extension is followed by the methylated signal intensity read in the green channel.

**(Optional) Preprocessing Method**  
 No Selection (use default)

Mapping Illumina methylation array data to the genome with or without additional preprocess.

**Phenotype Table**  
 10: ucsc.gtf

Table of compared probes and their characteristics, may be categorical (e.g. cancer vs. normal) or continuous (e.g. blood pressure).

**maxGap Size**  
 250

If cluster is not provided this maximum location gap will be used to define cluster.

**Cutoff Size**  
 0.1

A numeric value. Values of the estimate of the genomic profile above the cutoff or below the negative of the cutoff will be used as candidate regions. It is possible to give two separate values (upper and lower bounds). If one value is given, the lower bound is minus the value.

**Number of Resamples**  
 0

An integer denoting the number of resamples to use when computing null distributions. This defaults to 0. If permutations is supplied that defines the number of permutations/bootstraps and B is ignored.

**null Method**  
 permutation

Method used to generate null candidate regions (defaults to 'permutation'). Note that for cases with more than one covariate the permutation approach is not generally recommended.

**Phenotype Type**  
 categorical

**Figure 2.** Screenshot from the Galaxy interface, showing Infinium Human Methylation BeadChip workflow as discussed in the analyses section.

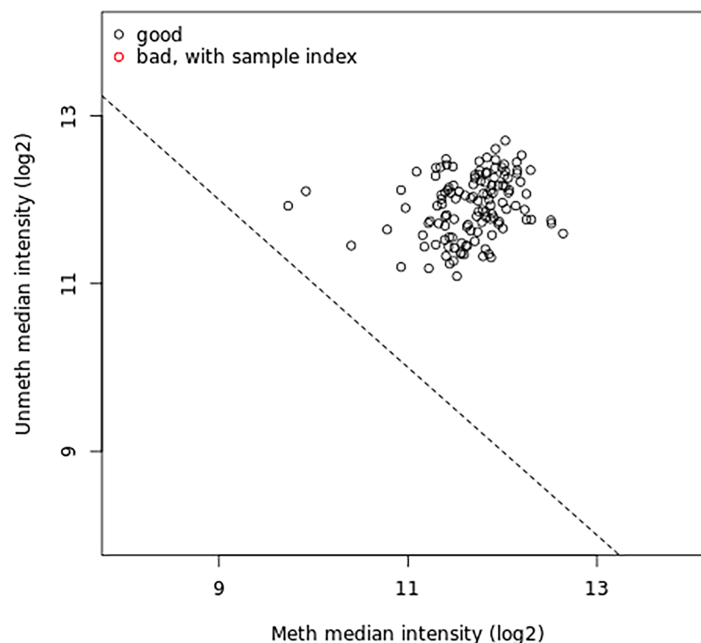

**Figure 3.** Quality control plot represent median intensity of melanoma pre and post MAPKi treatment samples. Plot compare median total intensity (Log<sub>2</sub>) of the methylated channel (x-axis) and unmethylated channel (y-axis). Bad-quality samples fall under the threshold and are colored red. There is no bad quality sample in this study.

### Availability of source code and requirements

- Project name: Ewastools: Infinium Human Methylation BeadChip pipeline for population epigenetics integrated into

Galaxy  
 • Project home page: [https://github.com/kpbioteam/ewas\\_](https://github.com/kpbioteam/ewas_)

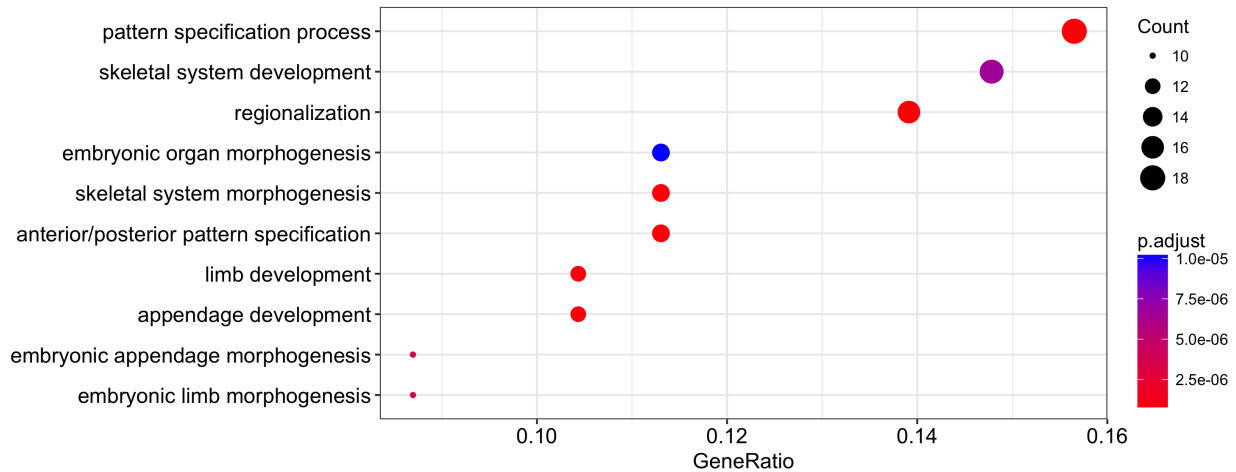

Figure 4. Functional Annotation of DMR's found in melanoma biopsies pre and post MAPKi treatment.

#### galaxy

- Operating system(s): Linux (recommended), Mac
- Programming language: R programming language (version 3.3.2, x86 64bit)
- Other requirements: Galaxy [22], Docker [30]
- License: MIT License
- biotoolsID identifier: biotools:ewastools
- RRID: SCR\_018085

#### Availability of supporting data and materials

Test dataset in this article is available in the GEO database under accession GSE65186. The results of the re-analysis of the GSE65186 dataset are available in the GitHub repository ([https://github.com/kpbioteam/ewastools-case\\_study](https://github.com/kpbioteam/ewastools-case_study)). All tools described here are available in the Galaxy Toolshed (<https://toolshed.g2.bx.psu.edu>). The Dockerfile required to automatically deploy the pre-built Docker image is available at (<https://galaxyproject.org/use/ewas-galaxy/>). Archival snapshots of the code are available in the GigaScience GigaDB repository [31].

#### List of Abbreviations

- DMP Differentially methylated positions
- DMR Differentially methylated regions
- EWAS Epigenome-wide association study
- GO Gene Ontology
- PCR Polymerase Chain Reaction
- RRBS Reduced Representation Bisulfite Sequencing
- SNP Single nucleotide polymorphism
- SNP Transcription Start Site
- WGBS Whole Genome Bisulfite Sequencing

#### Competing interests

The authors declare that they have no competing interests.

#### Acknowledgements

We would like to thank Michal Gdula for constructive criticism of the manuscript.

#### References

1. Illumina I, Infinium Methylation Assay Overview; 2018. <https://emea.illumina.com/science/technology/beadarray-technology/infinium-methylation-assay.html>.
2. Lee JJ, Murphy GF, Lian CG. Melanoma epigenetics: novel mechanisms, markers, and medicines. *Laboratory investigation* 2014;94(8).
3. Rakyan VK, Down TA, Balding DJ, Beck S. Epigenome-wide association studies for common human diseases. *Nature Reviews Genetics* 2011;12(8).
4. Egger G, Liang G, Aparicio A, Jones PA. Epigenetics in human disease and prospects for epigenetic therapy. *Nature* 2004;429(6990).
5. Klose RJ, Bird AP. Genomic DNA methylation: the mark and its mediators. *Trends in biochemical sciences* 2006;31(2).
6. Sandoval J, MESSMJPMBMEM Heyn H. Validation of a DNA methylation microarray for 450,000 CpG sites in the human genome. *Epigenetics* 2011;6(6):692–702.
7. Kristensen LS, Hansen LL. PCR based methods for detecting single locus DNA methylation biomarkers in cancer diagnostics, prognostics, and response to treatment. *Clinical chemistry* 2009;55(8):1471–1483 0009 9147.
8. Pidsley R, Wong CCY, Volta M, Lunnon K, Mill J, Schalkwyk LC. A data driven approach to preprocessing Illumina 450K methylation array data. *BMC genomics* 2013;14(1):293–1471 2164.
9. Marabita F, Almgren M, Lindholm ME, Ruhrmann S, Fagerström-Billai F, Jagodic M, et al. An evaluation of analysis pipelines for DNA methylation profiling using the Illumina HumanMethylation450 BeadChip platform. *Epigenetics* 2013;8(3).
10. Peters TJ, Buckley M, Statham AL, Pidsley R, Clark SJ, Mollay PL, DMRcate Illumina 450 K methylation array apatial analysis methods; 2014. <https://bioc.ism.ac.jp/packages/2.14/bioc/html/DMRcate.html>.
11. Hansen KD, Aryee M, minfi: Analyze Illumina's 450k methylation arrays; 2012. <https://bioconductor.org/packages/release/bioc/html/minfi.html>.
12. Morris TJ, Butcher LM, Feber A, Teschendorff AE, Chakravarty AR, Wojdacz TK, et al. ChAMP 450k chip analysis methylation pipeline. *Bioinformatics* 2013;30(3):428–430 1460 2059.
13. Davis S, Du P, Bilke S, Triche T, Bootwalla M. methylumi Handle Illumina methylation data. R package version 2012;2(0).



14. Assenov Y, Muller F, Lutsik P, Walter J, Lengauer T, Bock C. Comprehensive analysis of DNA methylation data with RnBeads. *Nature methods* 2014;11(11):1138-1148.
15. Goecks J, Nekrutenko A, Taylor J. Galaxy: a comprehensive approach for supporting accessible, reproducible, and transparent computational research in the life sciences. *Genome biology* 2010;11(8).
16. Murat, Poterlowicz, Source Code of EWAS Tools; 2018. <https://github.com/kpbioteam>.
17. Murat, Poterlowicz, Published Tools; 2018. [https://testtoolshed.g2.bx.psu.edu/repository/browse\\_repositories\\_in\\_categorysort=name&operation=repositories\\_by\\_user&id=0a77a6371a54a53](https://testtoolshed.g2.bx.psu.edu/repository/browse_repositories_in_categorysort=name&operation=repositories_by_user&id=0a77a6371a54a53).
18. Project G, Planemo documentation; 2014. <https://planemo.readthedocs.io/en/latest/>.
19. Aryee MJ, Jaffe AE, Corrada-Bravo H, Ladd-Acosta C, Feinberg AP, Hansen KD, et al. Minfi: a flexible and comprehensive Bioconductor package for the analysis of Infinium DNA methylation microarrays. *Bioinformatics* 2014;30(10).
20. Jaffe AE, Murakami P, Lee H, Leek JT, Fallin MD, Feinberg AP, et al. Bump hunting to identify differentially methylated regions in epigenetic epidemiology studies. *International journal of epidemiology* 2012;41(1).
21. Consortium GO. The Gene Ontology (GO) database and informatics resource. *Nucleic acids research* 2004;32(suppl\_1):D258-D261.
22. Murat, Poterlowicz, EWAS suite training; 2018. <https://galaxyproject.github.io/training-material/topics/epigenetics/tutorials/ewas-suite/tutorial.html>.
23. Murat, Poterlowicz, EWAS suite training data; 2018. <https://zenodo.org/record/1251211#.WwREQ1Mvz-Y>.
24. Verma M. Genome-wide association studies and epigenome-wide association studies go together in cancer control. *Future Oncology* 2016;12(13):1645-1664.
25. Hugo W, Shi H, Sun L, Piva M, Song C, Kong X, et al. Non genomic and immune evolution of melanoma acquiring MAPK1 resistance. *Cell* 2015;162(6):1271-1285.
26. Bock C, Lengauer T. Computational epigenetics. *Bioinformatics* 2008;24(1):1-10.
27. Osaki M, Chinen H, Yoshida Y, Ohhira T, Sunamura N, Yamamoto O, et al. Decreased PITX1 gene expression in human cutaneous malignant melanoma and its clinicopathological significance. *European Journal of Dermatology* 2013;23(3):344-349.
28. Clermont PL, Sun L, Crea F, Thu KL, Zhang A, Parolia A, et al. Genotranscriptomic meta analysis of the Polycomb gene CBX2 in human cancers initial evidence of an oncogenic role. *British journal of cancer* 2014;111(8):1663-1672.
29. Ashburner M, Ball CA, Blake JA, Botstein D, Butler H, Cherry JM, et al. Gene Ontology tool for the unification of biology. *Nature genetics* 2000;25(1):25-33.
30. Developers S, Docker documentation; 2017. <https://media.readthedocs.org/pdf/docker-sean/latest/docker-sean.pdf>.
31. Murat K, Grüning B, Poterlowicz PW, Westgate G, Tobin DJ, Poterlowicz K, Supporting data for "Ewastools: Infinium Human Methylation BeadChip pipeline for population epigenetics integrated into Galaxy" GigaScience Database; 2020. <http://dx.doi.org/10.5524/100744>.

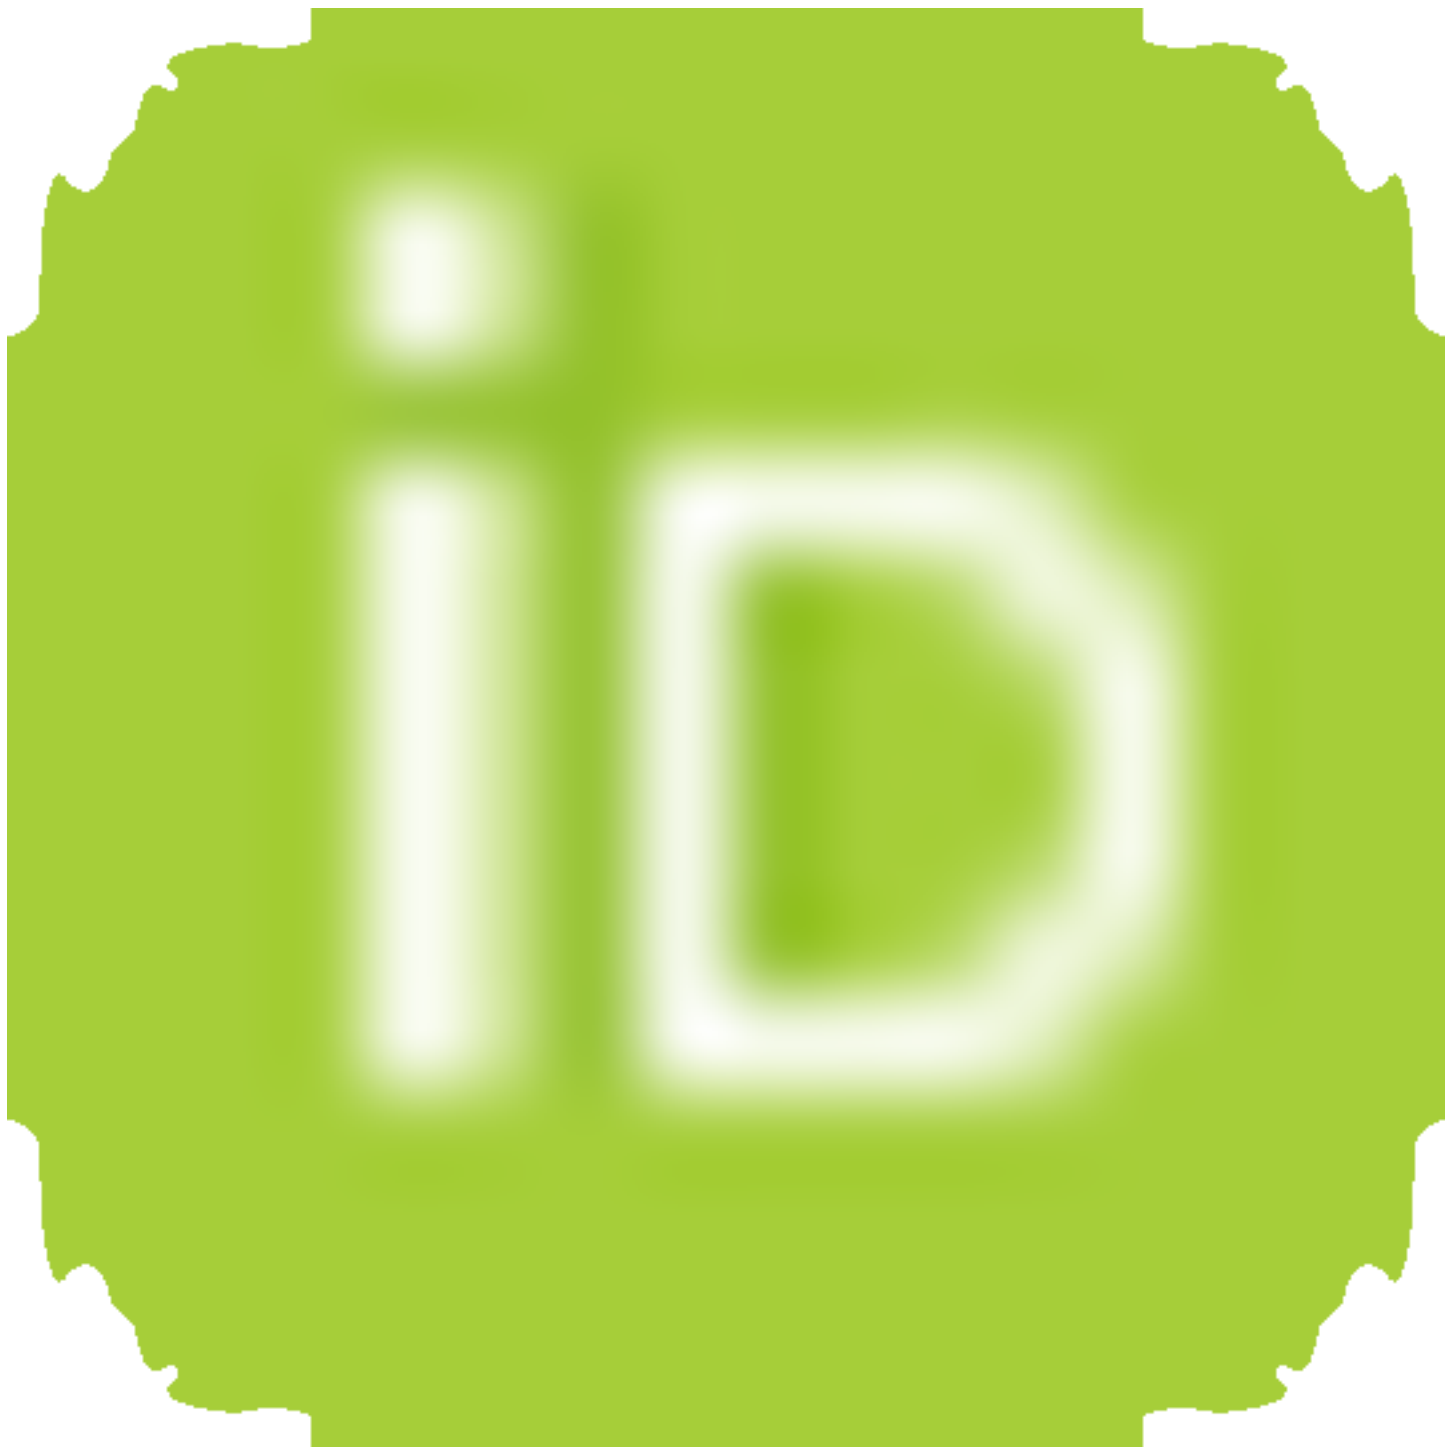

Supplement: giaa049_giga-d-19-00088_revision_2.pdf [file giaa049_giga-d-19-00088_revision_2.pdf]
